# Supplementary material for: Evolution of Nucleophilic High-molecular-weight Organic Compounds in Ambient Aerosols
Source: Copernicus journal article supplement (doi:10.5194/egusphere-2023-936), 2023-06-06
Supplement: Supplementary file 1 [file egusphere-2023-936-supplement.pdf]

1 *Supportive information*

2 **Evolution of Nucleophilic High-molecular-weight**  
3 **Organic Compounds in Ambient Aerosols**

4 **Chen He<sup>1</sup>, Hanxiong Che<sup>2</sup>, Zier Bao<sup>2</sup>, Yiliang Liu<sup>2</sup>, Qing Li<sup>2</sup>, Miao Hu<sup>3</sup>, Jiawei**  
5 **Zhou<sup>2</sup>, Shumin Zhang<sup>4</sup>, Xiaojiang Yao<sup>2</sup>, Quan Shi<sup>1</sup>, Chunmao Chen<sup>1</sup>, Yan Han<sup>2</sup>,**  
6 **Lingshuo Meng<sup>2</sup>, Xin Long<sup>2</sup>, Fumo Yang<sup>5</sup> and Yang Chen<sup>2\*</sup>**

7

8 <sup>1</sup>State Key Laboratory of Heavy Oil Processing, China University of Petroleum, Beijing 102249, China.

9 <sup>2</sup>Research Center for Atmospheric Environment, Chongqing Institute of Green and Intelligent  
10 Technology, Chinese Academy of Sciences, Chongqing 400714, China.

11 <sup>3</sup>CNOOC Institute of Chemicals & Advanced Materials, Beijing 102200, China.

12 <sup>4</sup>Institute of Basic Medicine and Forensic Medicine, North Sichuan Medical College, Nanchong 637000,  
13 Sichuan, China.

14 <sup>5</sup> Department of Environmental Science and Engineering, College of Architecture and Environment,  
15 Sichuan University, Chengdu 610065, China

16 *Correspondence to:* Yang Chen (chenyang@cigit.ac.cn)

17

## 18 1. Methods

### 19 1.1 FT-ICR MS analysis

20 FT-ICR MS was calibrated using a reference list formed by the manually assigned  
21 known formula in Data Analysis. Mass peaks with a signal-to-noise (S/N) ratio  $\geq 4$   
22 were exported to a data sheet. Data analysis was performed using in-house software.  
23 The assigned formulae were limited in the following elemental composition:  $^{12}\text{C}_{0-100}$ ,  
24  $^1\text{H}_{0-200}$ ,  $^{14}\text{N}_{0-10}$ ,  $^{16}\text{O}_{0-20}$ , and  $^{32}\text{S}_{0-2}$ . The formula assignment section set the mass accuracy  
25 window was set to 1.0 ppm in formula assignment section. All elemental formulae  
26 should meet basic chemical criteria: (1) the number of H atoms should be at least 1/3  
27 that of C atoms and cannot be greater than that of  $2\text{C} + \text{N} + 2$ ; (2) the sum number of  
28 N and H atoms should be even; and (3) the H/C and O/C value should be restricted to  
29 be less than 3 and 1.5, respectively.

30 These compound groups were: ; lipids (O/C = 0–0.2, H/C = 1.7–2.2); Aliphatics (O/C  
31 = 0.2–0.6, H/C = 1.5–2.2); lignin (O/C = 0.1–0.6, H/C = 0.6–1.7,  $\text{AI}_{\text{mod}} < 0.67$ );  
32 carbohydrates (O/C = 0.6–1.2, H/C = 1.5–2.2); tannins (O/C = 0.6–1.2, H/C = 0.5–1.5,  
33  $\text{AI}_{\text{mod}} < 0.67$ ); unsaturated hydrocarbons (O/C = 0–0.1, H/C = 0.7–1.5); saturated  
34 compounds (H/C > 2.0); polycyclic aromatics (PCAs,  $\text{AI}_{\text{mod}} \geq 0.67$ ); polyphenols ( $0.67$   
35  $\geq \text{AI}_{\text{mod}} \geq 0.50$ ); and highly unsaturated compounds ( $\text{AI}_{\text{mod}} < 0.50$ , H/C < 1.5)

36 The double bond equivalent (DBE) and modified aromaticity index ( $\text{AI}_{\text{mod}}$ ) value are  
37 calculated as Eqs. S1 and S2 (Koch and Dittmar, 2006; Koch and Dittmar, 2016):

$$38 \quad \text{DBE} = \text{C} - 0.5\text{H} + 0.5\text{N} + 1 \quad (\text{S1})$$

$$39 \quad \text{AI}_{\text{mod}} = (1 + \text{C} - 0.5\text{O} - \text{S} - 0.5\text{H}) / (\text{C} - 0.5\text{O} - \text{S} - \text{N} - \text{P}) \quad (\text{S2})$$

40 A Kendrick mass defect (KMD) analysis is used to provide an overview of the  
41 composition of the identified formulae in NFC samples. The KMD calculations are  
42 shown in Eqs. (S3 and S4) (Sleighter and Hatcher, 2007):

$$43 \quad \text{Kendrick mass (F)} = (\text{observed mass}) \times \frac{\text{nominal mass(F)}}{\text{exact mass(F)}} \quad (\text{Eq. S3})$$

$$44 \quad \text{KMD} = \text{nominal mass} - \text{Kendrick mass (F)} \quad (\text{Eq. S4})$$

45 where F stands for the functional groups or repeated groups, including COO, OO,  
46 CH<sub>2</sub>O, and H<sub>2</sub>O.

47

48 The value of  $X_c$  is used to characterize aromatic and polyaromatic compounds in highly  
49 complex compound mixtures.  $X_c$  normally ranges from 0 to 3.0 and is calculated as Eqs.  
50 (S5) (Yassine et al., 2014):

$$51 \quad X_c = \frac{3(\text{DBE} - mN_O - nN_S) - 2}{\text{DBE} - mN_O - nN_S} \quad (\text{Eq. S5})$$

52 If  $\text{DBE} \leq mN_O + nN_S$ , then  $X_c = 0$ . For (-)ESI and (+)ESI mode, we used  $m=n=0.5$  and  
53  $m=n=1.0$  for the  $X_c$  in this study.

54

55 Figures

56

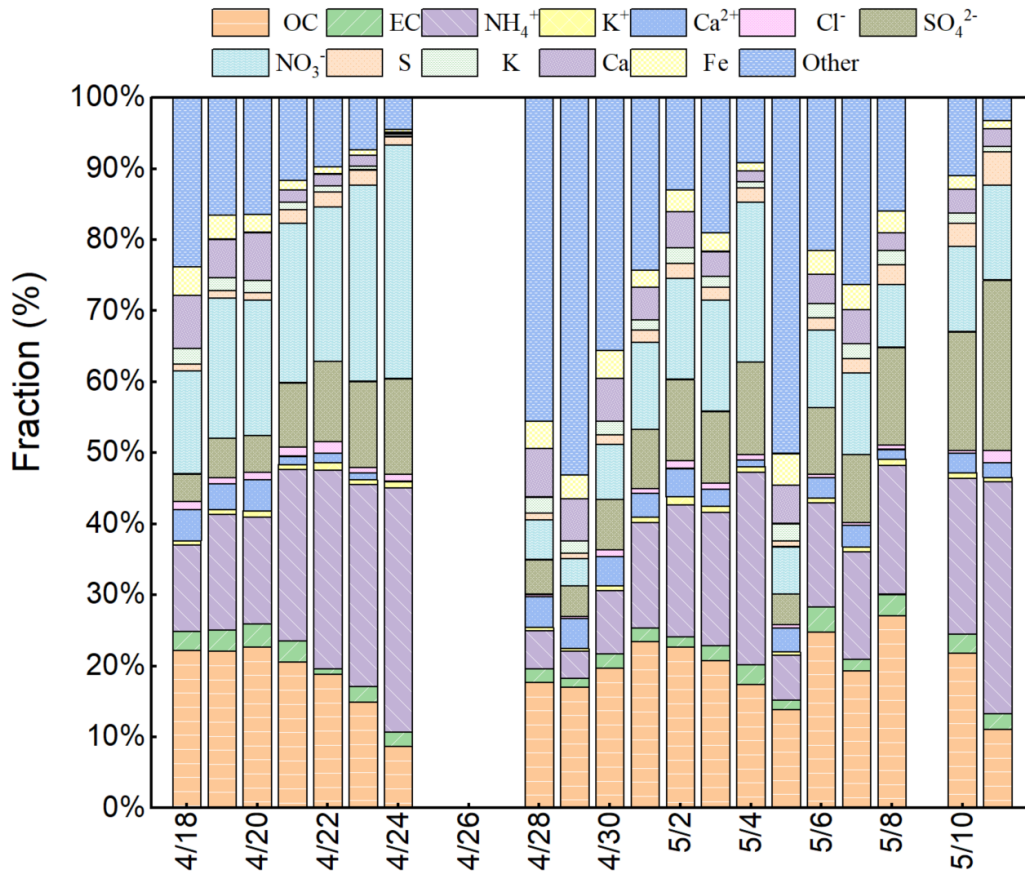

57

58 Figure S1. Fraction of OC, EC, water-soluble ions, and crustal elements during the  
59 sampling period.

60

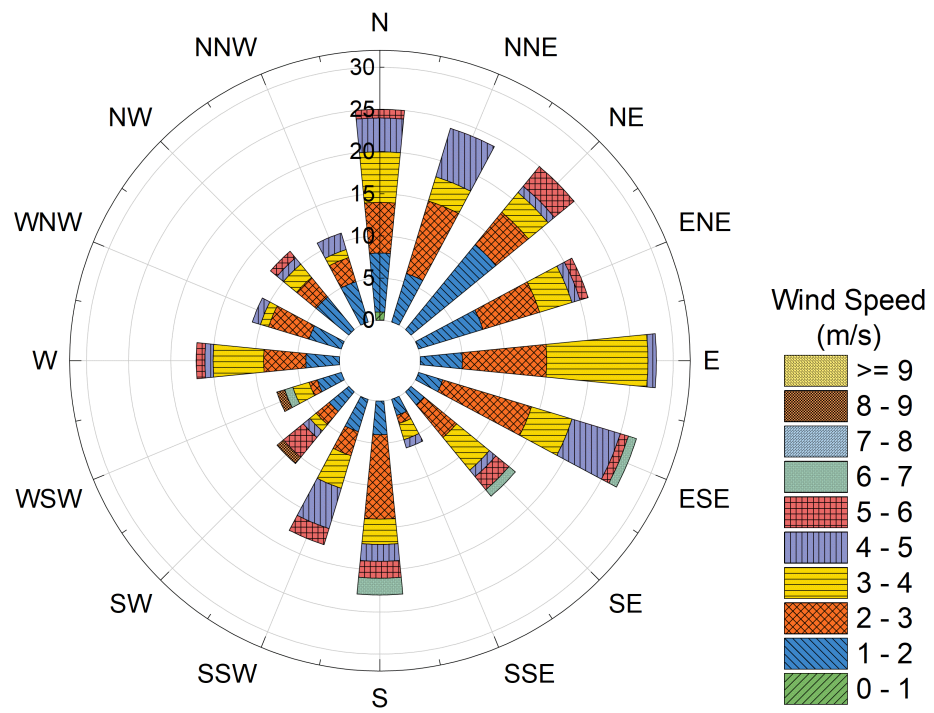

61

62

63 Figure S2. Windrose plot during the sampling period.

64

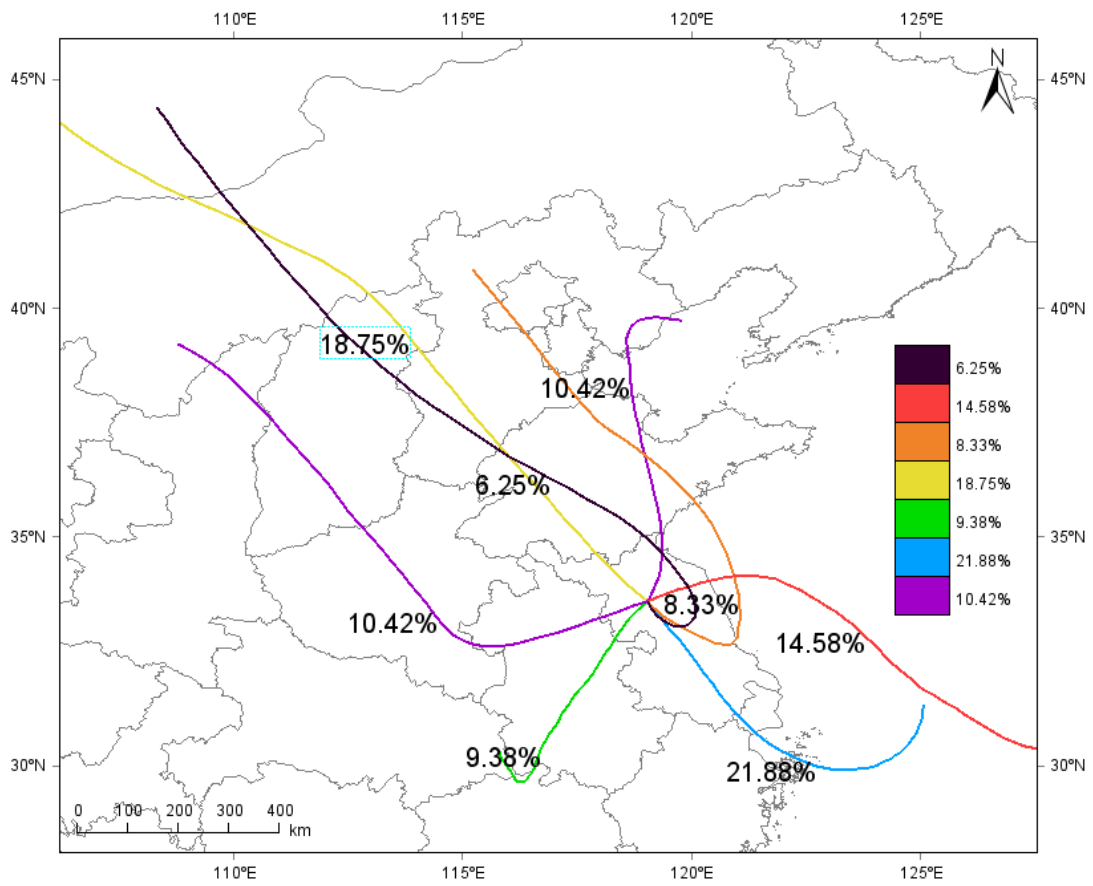

65

66 Figure S3. Backward trajectory of air mass passing through the sampling site.

67

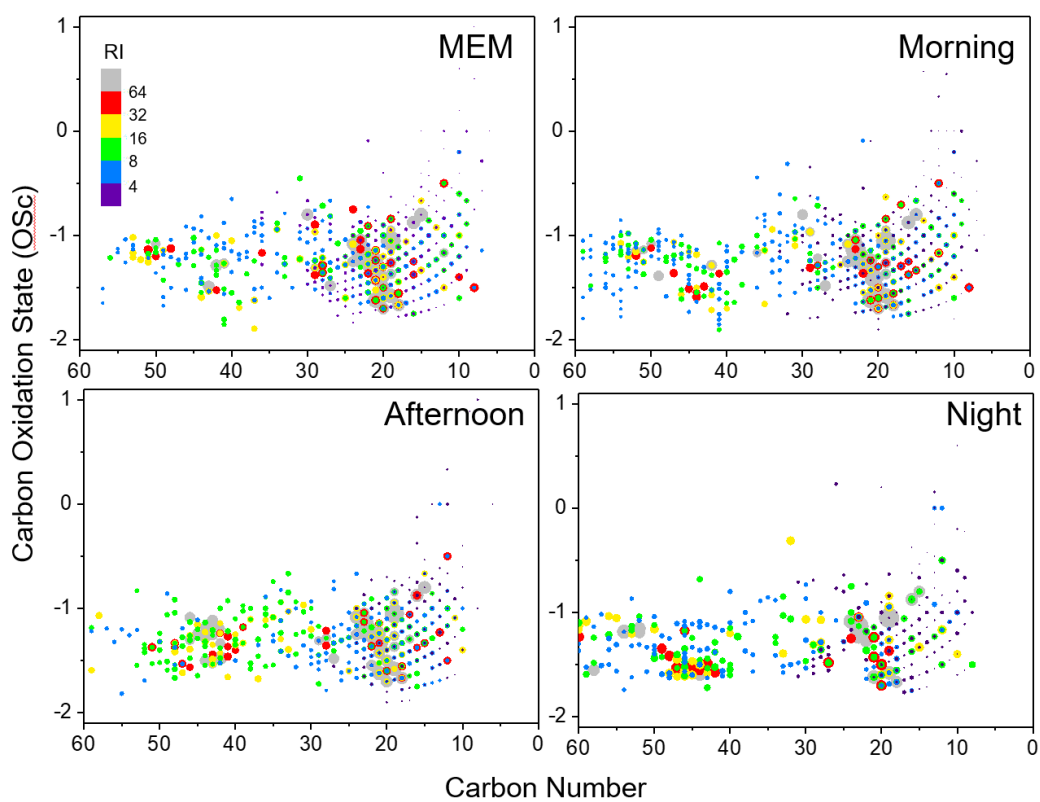

69

70

71 Figure S4. Overlaid carbon oxidation state (OSc) symbols for CHO species. The size  
72 and color bar of the markers reflect the relative peak intensities of molecular formulae  
73 on a logarithmic scale. RI: relative intensity.

74

75

76

77

78

79

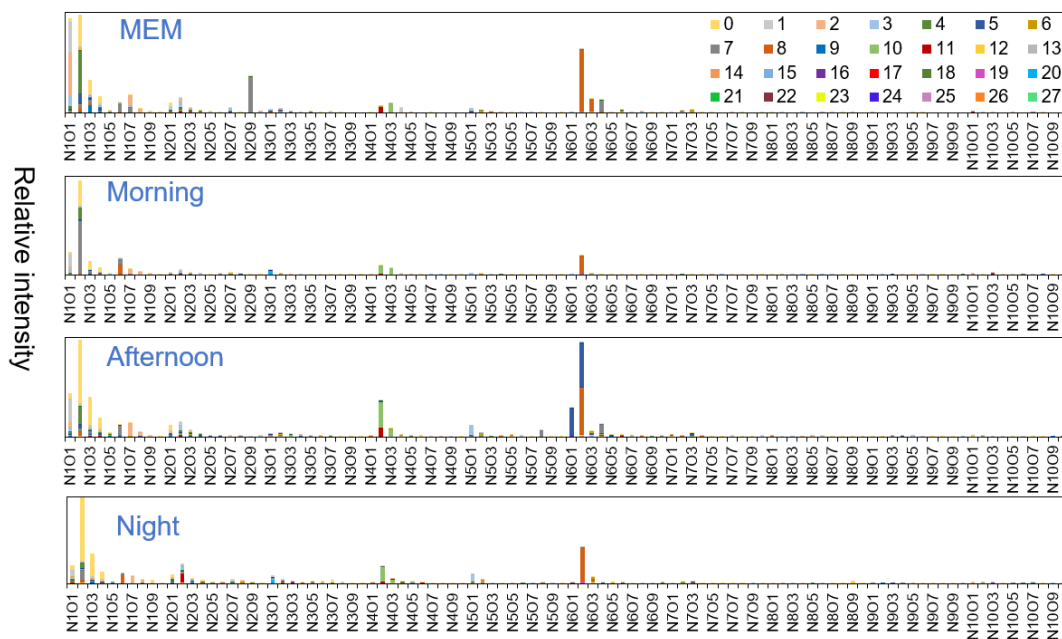

80

81 Figure S5. Relative abundance of CHON species in aerosol samples obtained by +ESI  
 82 FT-ICR MS as well as the double bond equivalent (DBE) distribution. The color bar  
 83 denotes the DBE value. The height of the symbols reflects the relative peak intensity of  
 84 molecular formulae.

85

86



87 References

- 88 Koch BP, Dittmar T. From mass to structure: an aromaticity index for high-resolution  
89 mass data of natural organic matter. *Rapid Communications in Mass*  
90 *Spectrometry* 2006; 20: 926-932.
- 91 Koch BP, Dittmar T. From mass to structure: an aromaticity index for high-resolution  
92 mass data of natural organic matter. *Rapid Communications in Mass*  
93 *Spectrometry* 2016; 30: 250-250.
- 94 Sleighter RL, Hatcher PG. The application of electrospray ionization coupled to  
95 ultrahigh resolution mass spectrometry for the molecular characterization of  
96 natural organic matter. *Journal of Mass Spectrometry* 2007; 42: 559-574.
- 97 Yassine MM, Harir M, Dabek-Zlotorzynska E, Schmitt-Kopplin P. Structural  
98 characterization of organic aerosol using Fourier transform ion cyclotron  
99 resonance mass spectrometry: aromaticity equivalent approach. *Rapid Commun*  
100 *Mass Spectrom* 2014; 28: 2445-54.

101
